# Supplementary material for: Vasculature analysis of patient derived tumor xenografts using species-specific PCR assays: evidence of tumor endothelial cells and atypical VEGFA-VEGFR1/2 signalings
Source: PubMed Central journal article supplement (PMC4007753; doi:10.1186/1471-2407-14-178), 2014-03-13
Supplement: 1471-2407-14-178-S1.pdf [file 1471-2407-14-178-S1.pdf]

**Supplementary Table 1 : Sequences of oligonucleotides used**

| <b>Genes</b>     | <b>Upper primer</b>                      | <b>Lower primer</b>                         | <b>Accession number</b> |
|------------------|------------------------------------------|---------------------------------------------|-------------------------|
| <b>Total-TBP</b> | 5' TGC ACA GGA GCC AAG AGT GAA 3'        | 5' CAC ATC ACA GCT CCC CAC CA 3'            | M_003194 + NM_01368     |
| <b>Hs-TBP</b>    | 5' AGA ACA ACA GCC TGC CAC CTT AC 3'     | 5' GGG AGT CAT GGC ACC CTG AG 3'            | NM_003194               |
| <b>Mm-Tbp</b>    | 5' CCC TTG TAC CCT TCA CCA ATG AC 3'     | 5' TCA CGG TAG ATA CAA TAT TTT GAA GCT G 3' | NM_013684               |
| <b>Hs-PECAM1</b> | 5' CTG CTG ACC CTT CTG CTC TGT TC 3'     | 5' GGC AGG CTC TTC ATG TCA ACA CT 3'        | NM_000442               |
| <b>Mm-Pecam1</b> | 5' GAC TCA CGC TGG TGC TCT ATG C 3'      | 5' TCA GTT GCT GCC CAT TCA TCA 3'           | NM_008816               |
| <b>Hs-ENG</b>    | 5' CAG CCT CAG CCC CAC AAG TCT 3'        | 5' GGG CCC ACA GGC TGA AGG T 3'             | NM_000118               |
| <b>Mm-ENG</b>    | 5' TAT AGC TTT GTA CCC ACA ACA GGT CT 3' | 5' TGA GCT ACA CAG CCC TCG GA 3'            | NM_007932               |
| <b>Hs-VEGFR1</b> | 5' ATC ATT CCG AAG CAA GGT GTG AC 3'     | 5' TCC TTC TAT TAT TGC CAT GCG CT 3'        | NM_002019               |
| <b>Mm-Vegfr1</b> | 5' CCA CAA TCA CTC CAA AGA AAG GTA TG 3' | 5' TCA ATT CTG TTT CCT AAG TTG CTG CT 3'    | NM_010228               |
| <b>Hs-VEGFR2</b> | 5' TCA ACG TGT CAC TTT GTG CAA GAT AC 3' | 5' CCA GGA AAT TCT GTT ACC ATC AGG A 3'     | NM_002253               |
| <b>Mm-Vegfr2</b> | 5' TCA ATG TGT CTC TTT GCG CTA GGT AT 3' | 5' GGG AGA GTA AAG CCT ATC TCG CTG T 3'     | NM_010612               |
| <b>Hs-VEGFA</b>  | 5' CTT GCC TTG CTG CTC TAC CTC C 3'      | 5' CAT CCA TGA ACT TCA CCA CTT CGT 3'       | NM_003376               |
| <b>Mm-Vegfa</b>  | 5' GCA CTG GAC CCT GGC TTT ACT 3'        | 5' ATG AAC TTG ATC ACT TCA TGG GAC T 3'     | NM_009505               |
