# Supplementary material for: Vasculature analysis of patient derived tumor xenografts using species-specific PCR assays: evidence of tumor endothelial cells and atypical VEGFA-VEGFR1/2 signalings
Source: PubMed Central journal article supplement (PMC4007753; doi:10.1186/1471-2407-14-178), 2014-03-13

# Supplementary Figure 1

**a**

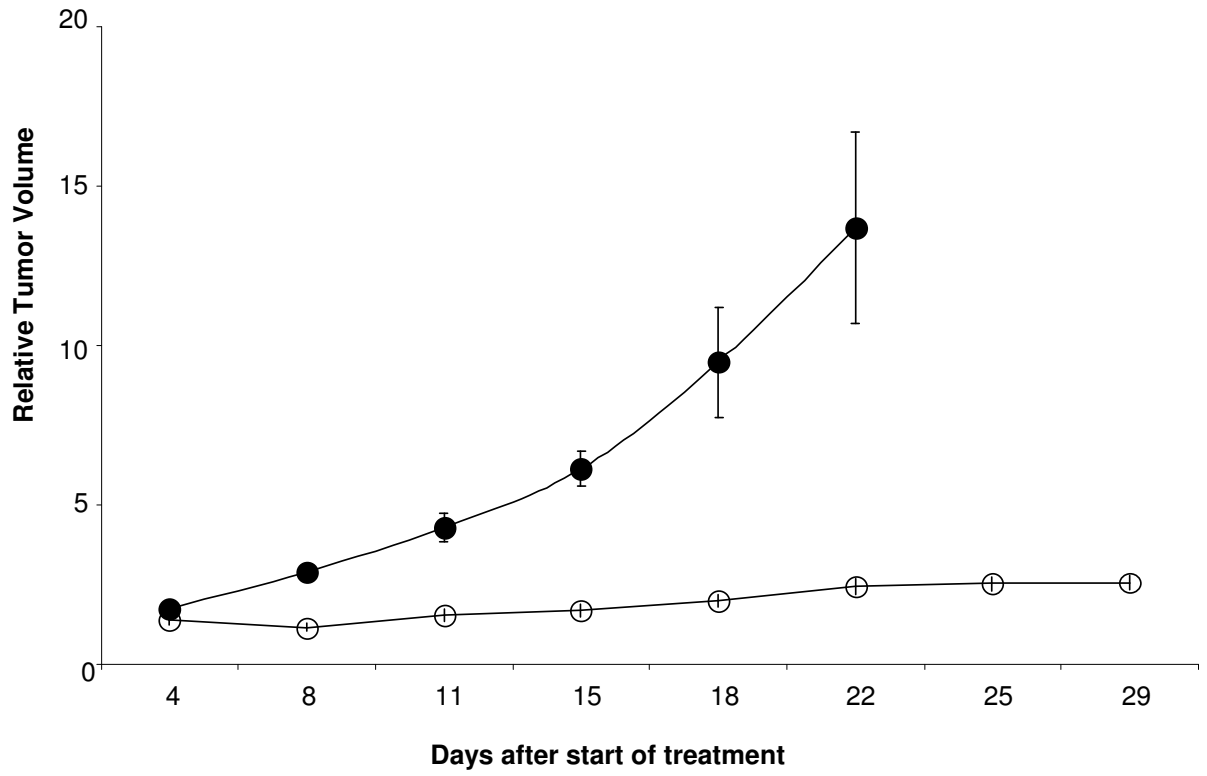

**b**

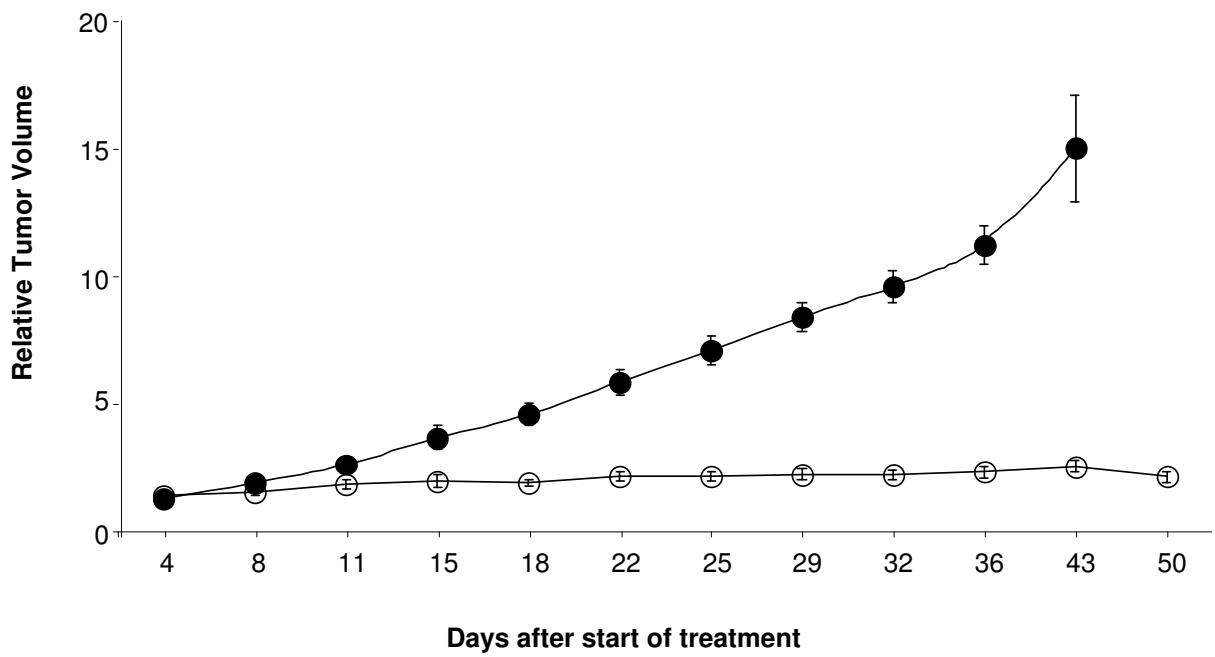

Supplement: 1471-2407-14-178-S2.pdf [file 1471-2407-14-178-S2.pdf]
